# Supplementary material
Source: PubMed Central journal article supplement (PMC5016154)
Supplement: 10.1074_M115.707950_jbc.M115.707950-1.pdf [file 10.1074_M115.707950_jbc.M115.707950-1.pdf]

## **The Cataract-linked Mutant Connexin50D47A Causes Endoplasmic Reticulum Stress in Mouse Lenses**

**Viviana M. Berthoud, Peter J. Minogue, Paul A. Lambert, Joseph I. Snabb, and Eric C. Beyer**

### **Supplemental Data**

- Supplemental Figure 1

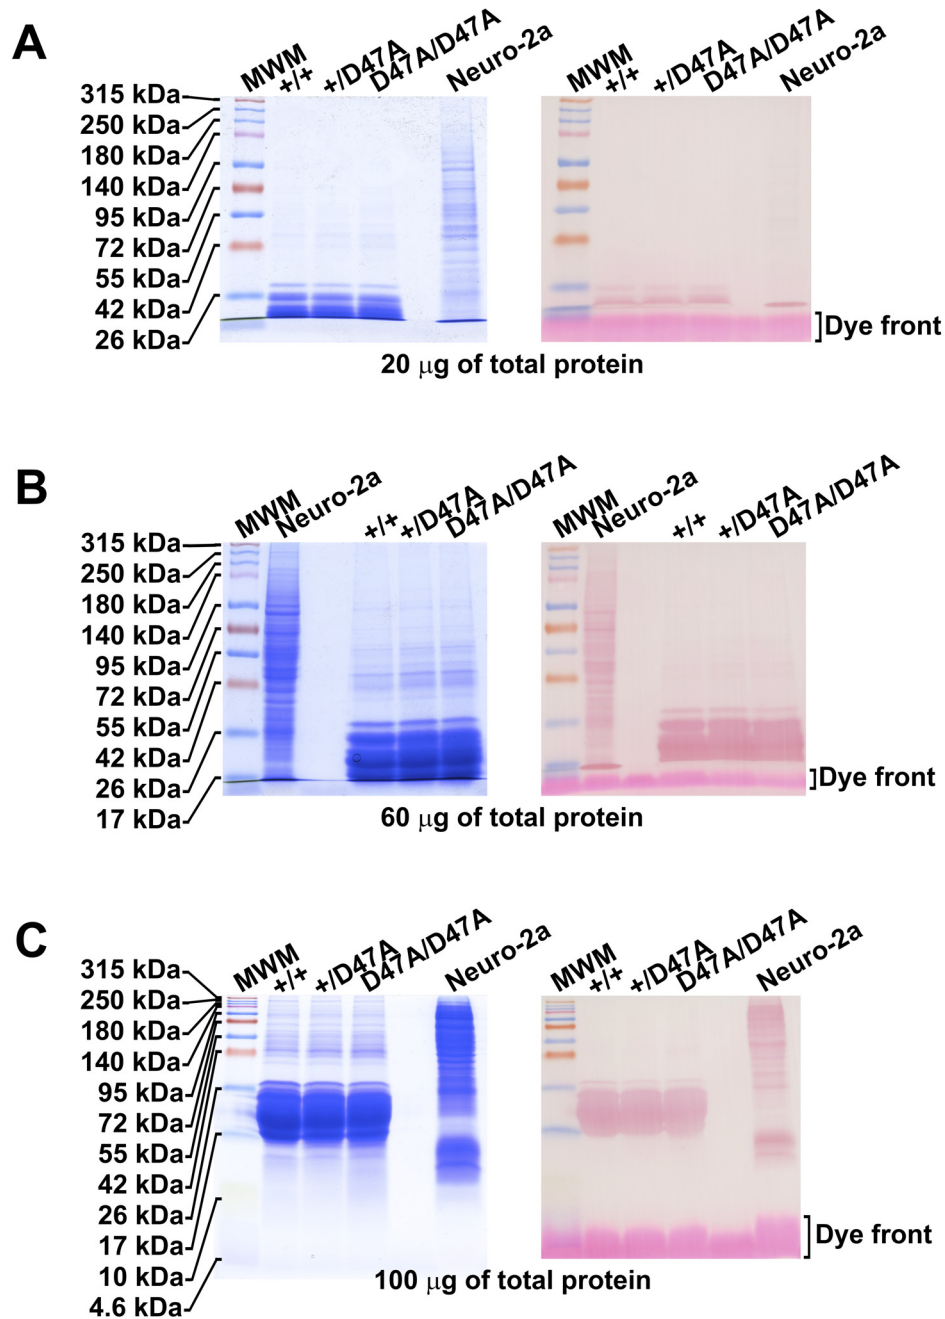

FIGURE S1.

Total homogenates from wild type (+/+), and heterozygous (+/D47A) and homozygous (D47A/D47A) lenses from 1-month old littermates were resolved on 8% (A and B) or 15% SDS-containing polyacrylamide gels. The gels were loaded with 20 (A), 60 (B) or 100 (C) µg of total protein per lane. The images show staining of gels with Coomassie Brilliant Blue (left panels) or Ponceau S (right panels) after electrotransfer of the proteins to Immobilon P. A total homogenate from Neuro-2a cells was run for comparison of the pattern of protein bands. Pre-stained molecular weight standards (MWM) were loaded on the first lane. Their molecular masses are indicated on the left. The position of the dye front is indicated on the right.
